# Supplementary material
Source: PubMed Central journal article supplement (PMC2824857)

# Supplement Material Figure I

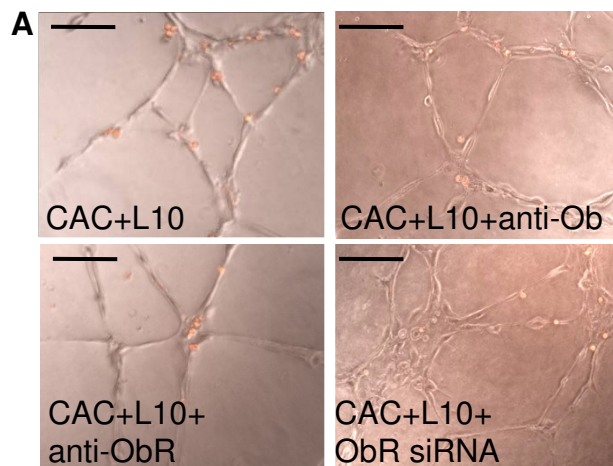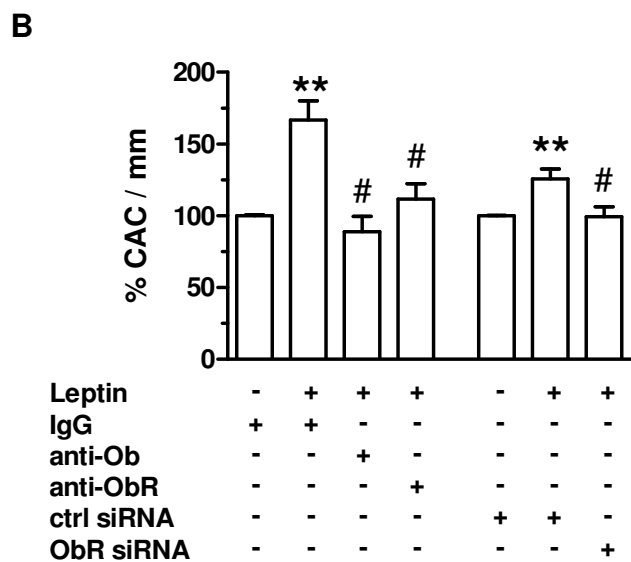

## Supplement Material Figure II

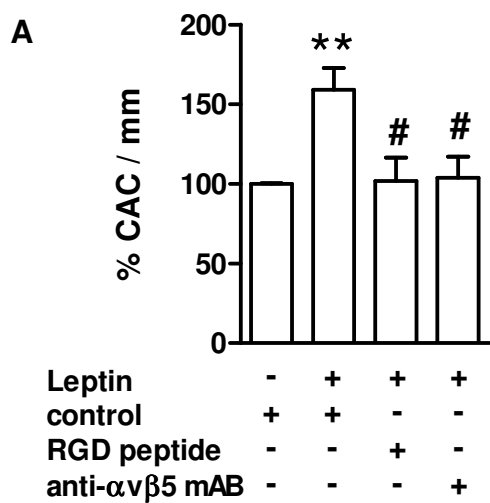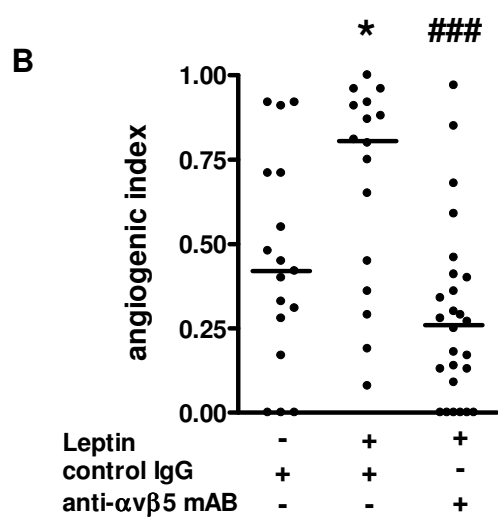

**Supplement Material Figure III**

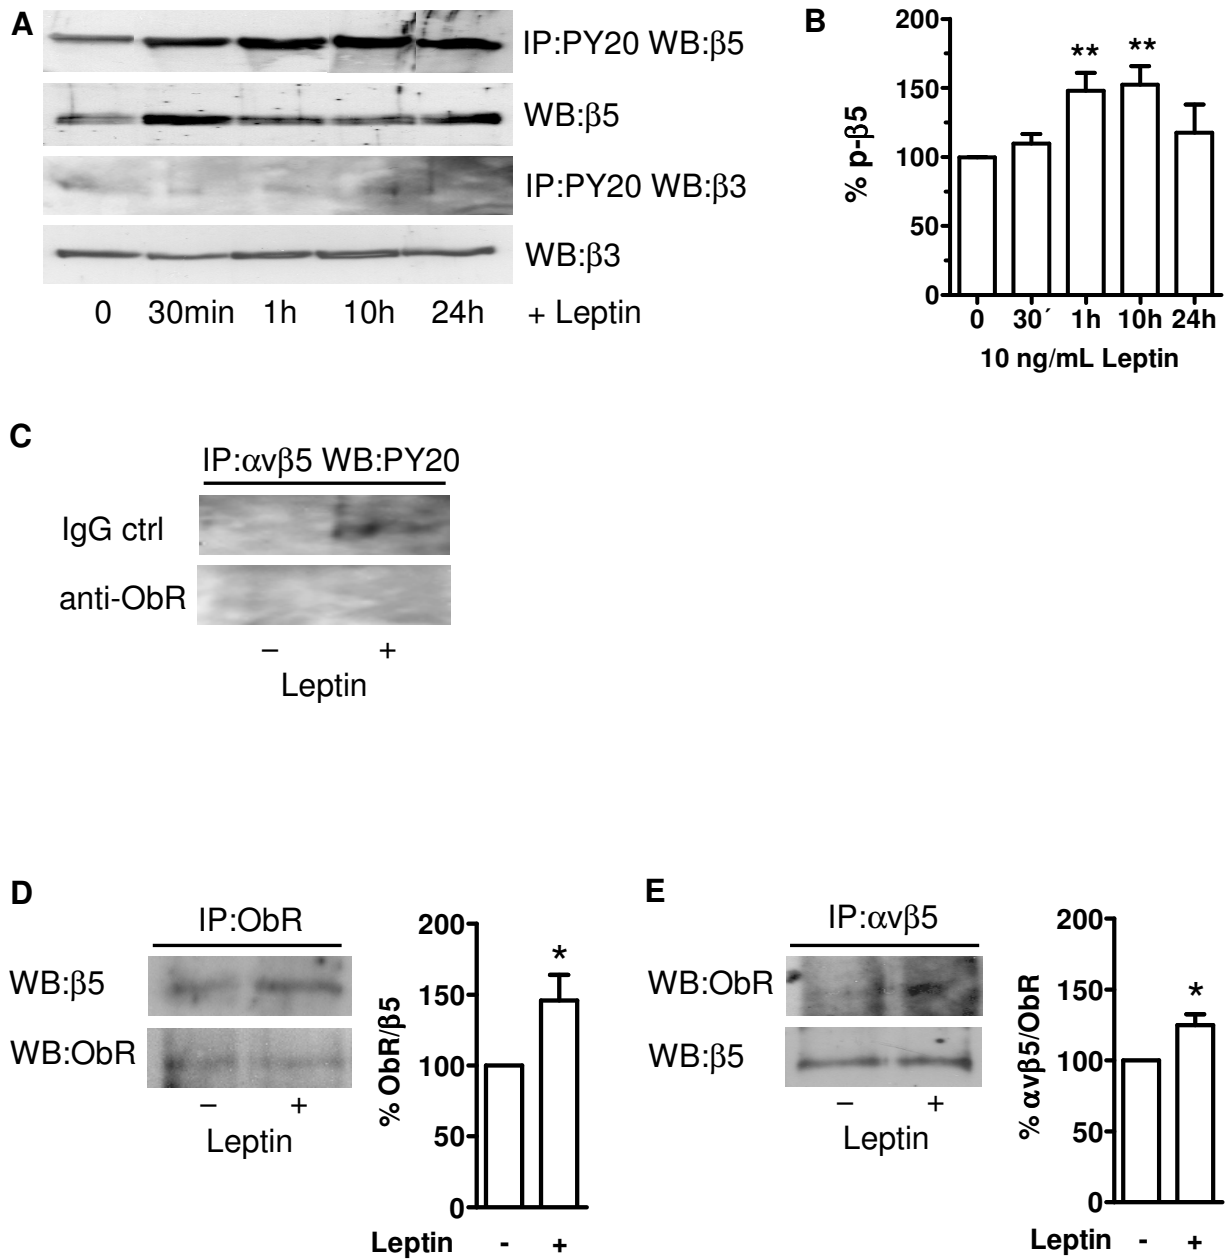

# Supplement Material Figure IV

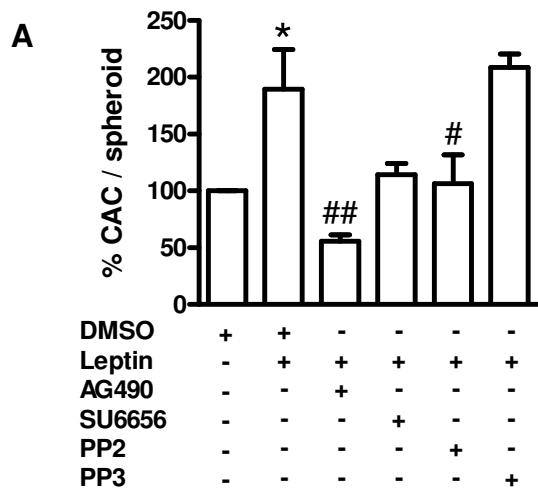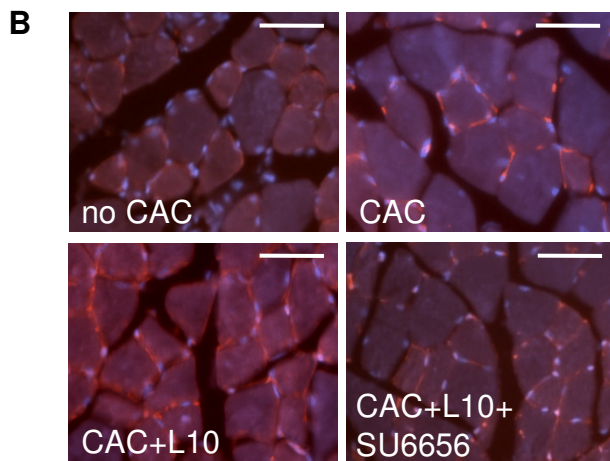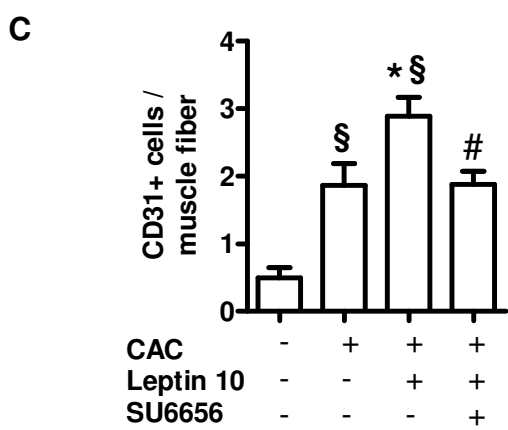

## Supplement Material Figure V

**A**

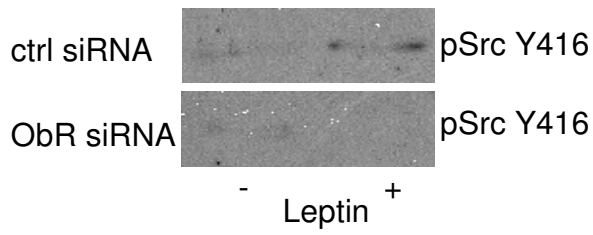

**B**

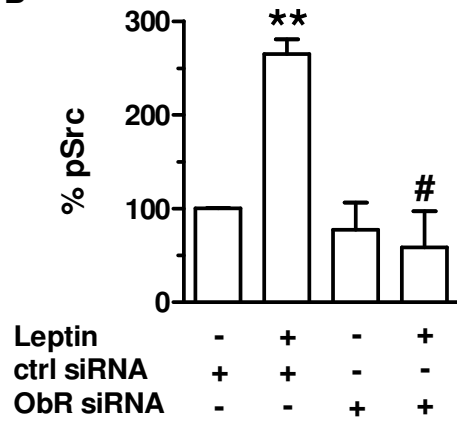

**C**

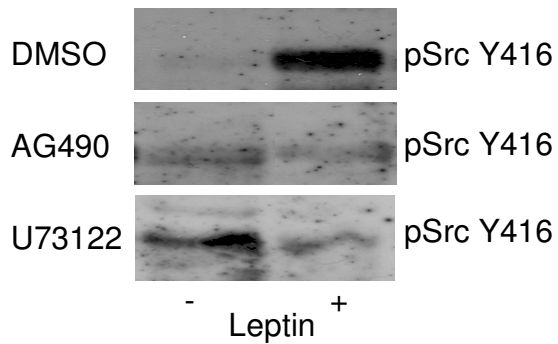

**D**

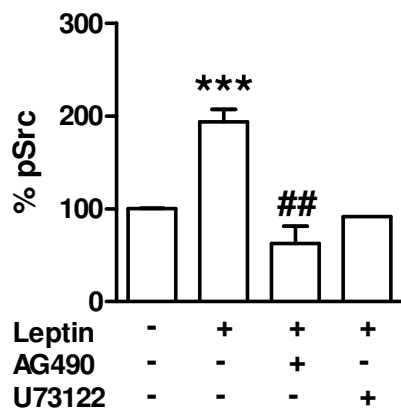

## Supplement Material Figure VI

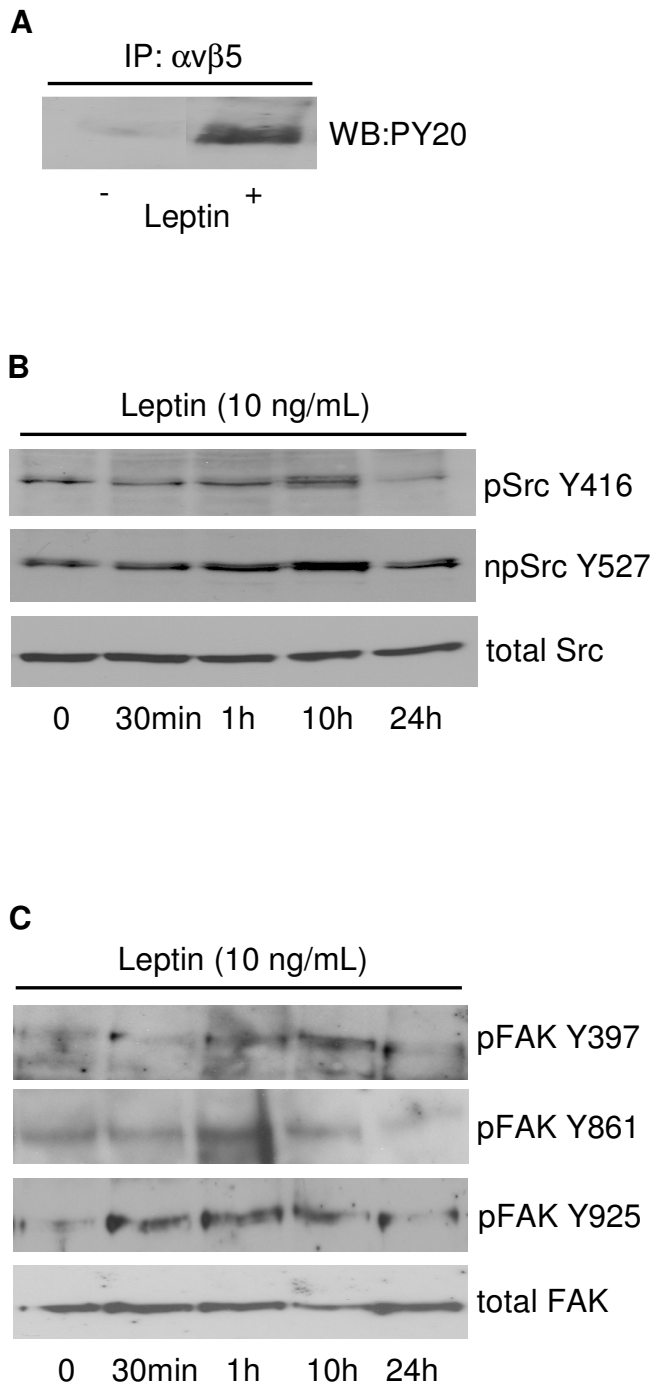

Supplement: NIHMS166782-supplement-Supp1.pdf [file NIHMS166782-supplement-Supp1.pdf]
